# Supplementary material
Source: Springer Nature journal article supplement (https://www.springermedizin.de/resource/supplementary/12885_2011_2711_MOESM11_ESM.pdf/9461760)
Supplement: MOESM11 [file 9461760]

**S-phase arrest**

**No S-phase arrest**

**Mre11 high**

**HCT116+Mre11  
MDA-MB-231  
most cell lines**

**MDA-MB-231 $\Delta$ Chk1  
HCC2998**

**Mre11 low**

**U251  
SK-MEL-2  
MALME-3M**

**HCT116  
IGROV1  
TK-10**
